# Supplementary material for: The genomic landscape of cutaneous SCC reveals drivers and a novel azathioprine associated mutational signature
Source: PubMed Central journal article supplement (PMC6131170; doi:10.1038/s41467-018-06027-1), 2018-09-10
Supplement: 41467_2018_6027_MOESM1_ESM.pdf [file 41467_2018_6027_MOESM1_ESM.pdf]

## **SUPPLEMENTARY INFORMATION**

**The genomic landscape of cutaneous SCC reveals drivers  
and a novel azathioprine associated mutational signature**

Gareth J Inman et al.

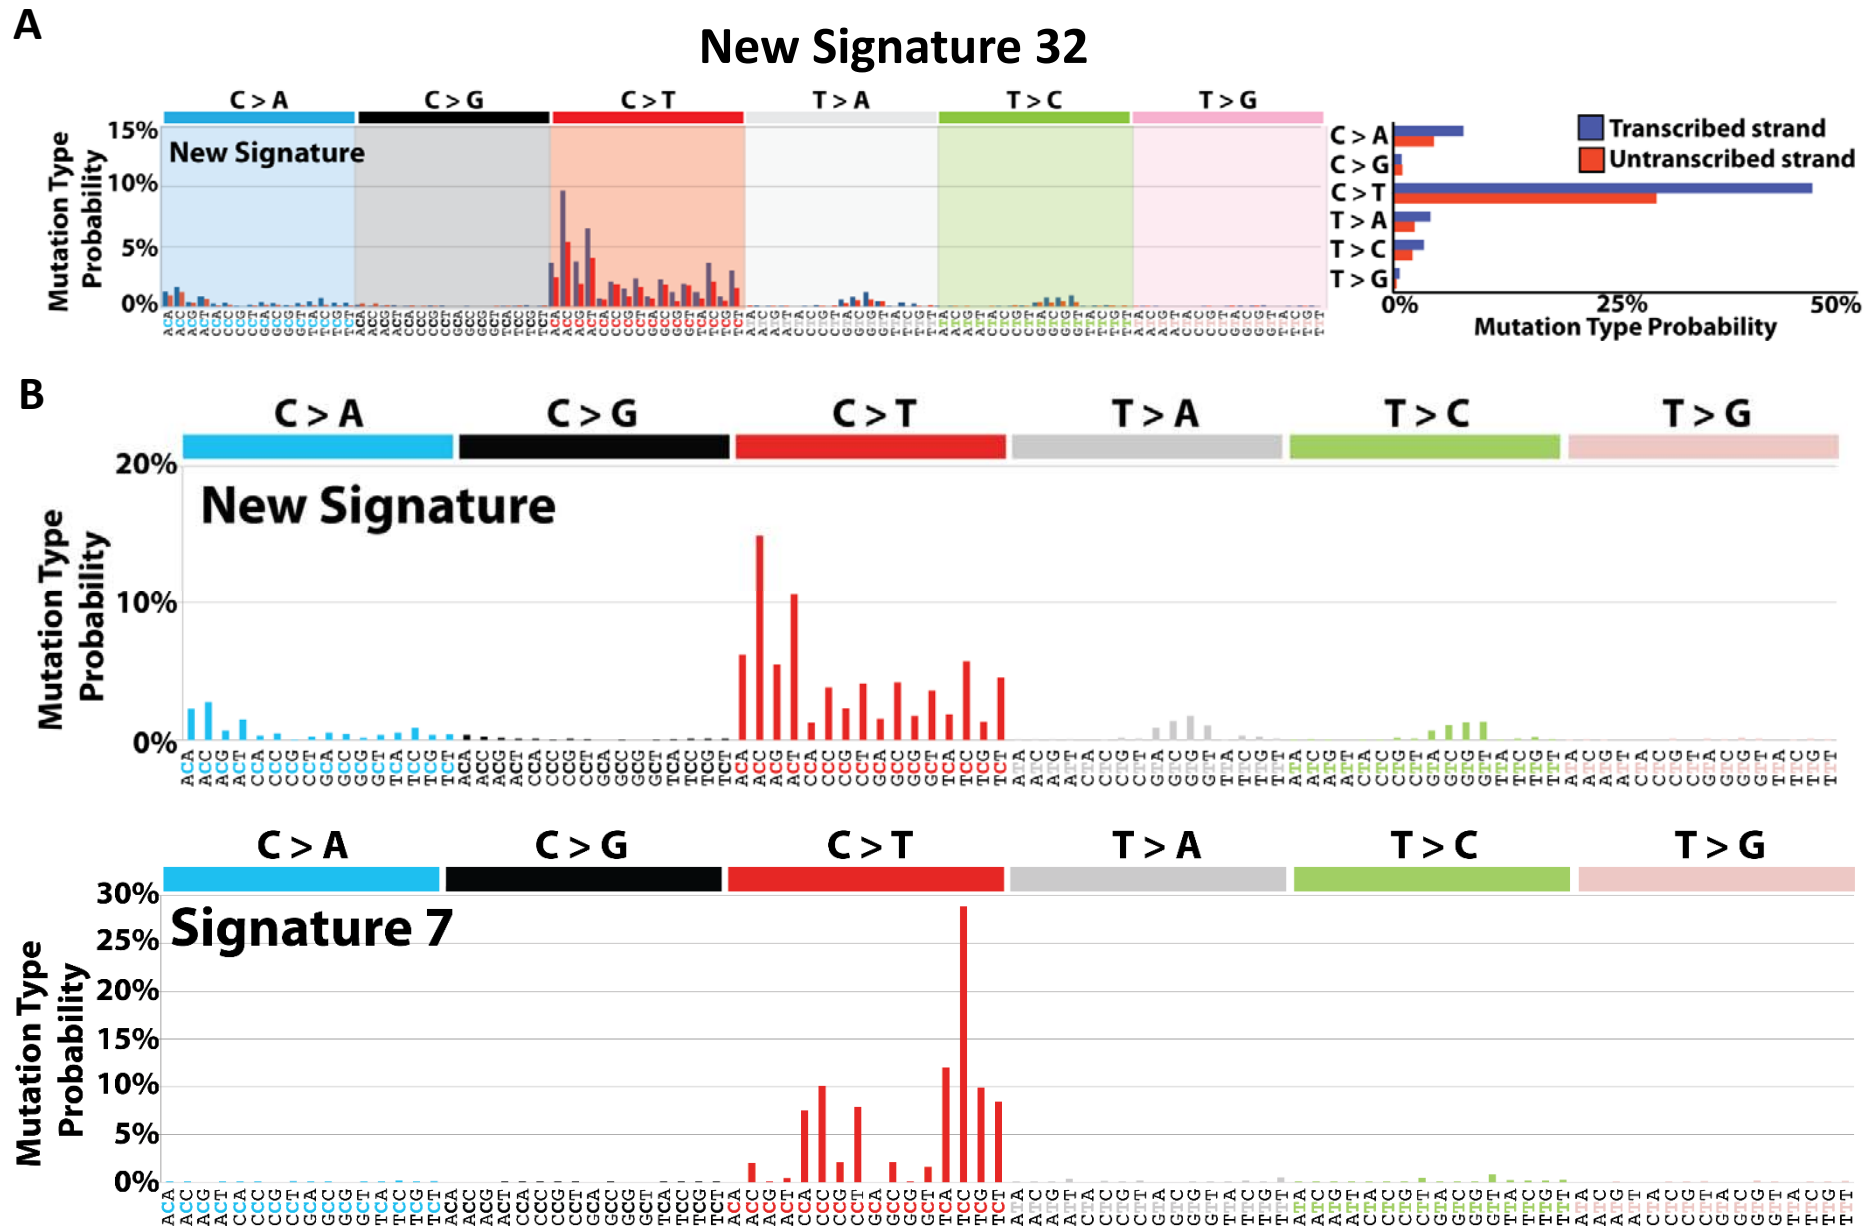

**Supplementary Figure 1.** Novel signature 32. It is predominately C>T mutations (75%) in combination with C>A, T>A, and T>C mutations. There seems to be a clear presence for C>X at ApCpN and T>X at GpTpN. This novel mutational signature exhibits a very strong transcriptional strand bias potentially indicating an interplay with TC-NER due to adducts on guanine and adenine (A). Comparison between Signature 32 and Signature 7 which is induced by UV exposure (B).



A

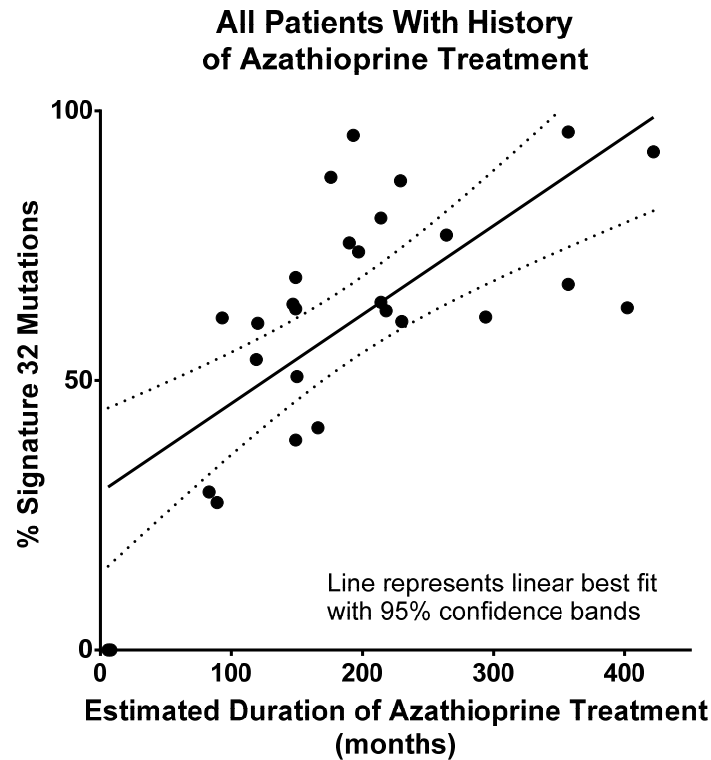

C

| Correlation    |                                                       |                         | % Signature 32 Mutations |
|----------------|-------------------------------------------------------|-------------------------|--------------------------|
| Spearman's rho | Estimated Duration of Azathioprine Treatment (months) | Correlation Coefficient | 0.679                    |
|                |                                                       | Sig. (2-tailed)**       | p < .0001                |
|                |                                                       | N                       | 28                       |

\*\* Correlation is significant at the 0.01 level (2-tailed).

B

| Sample | Estimated Duration of Azathioprine Treatment (months) | % Signature 32 Mutations |
|--------|-------------------------------------------------------|--------------------------|
| MD01   | 149                                                   | 38.94%                   |
| MD02   | 150                                                   | 50.72%                   |
| MD04   | 193                                                   | 95.49%                   |
| MD05   | 422                                                   | 92.41%                   |
| MD06   | 402                                                   | 63.47%                   |
| MD16   | 197                                                   | 73.87%                   |
| PD01   | 149                                                   | 63.29%                   |
| PD03   | 149                                                   | 69.11%                   |
| PD04   | 93                                                    | 61.62%                   |
| PD05   | 147                                                   | 64.15%                   |
| PD07   | 294                                                   | 61.76%                   |
| PD08   | 166                                                   | 41.22%                   |
| PD09   | 119                                                   | 53.88%                   |
| PD10   | 6                                                     | 0.00%                    |
| PD11   | 264                                                   | 76.98%                   |
| WD01   | 8                                                     | 0.00%                    |
| WD03   | 89                                                    | 27.35%                   |
| WD05   | 230                                                   | 60.95%                   |
| WD06   | 190                                                   | 75.50%                   |
| WD09   | 120                                                   | 60.60%                   |
| WD11   | 83                                                    | 29.32%                   |
| WD12   | 214                                                   | 80.15%                   |
| WD13   | 357                                                   | 67.84%                   |
| WD14   | 214                                                   | 64.52%                   |
| WD17   | 218                                                   | 62.92%                   |
| WD19   | 357                                                   | 96.11%                   |
| WD20   | 176                                                   | 87.71%                   |
| WD21   | 229                                                   | 87.06%                   |

**Supplementary Figure 3.** Duration of azathioprine treatment correlates with intensity of signature 32.

A. Scatterplot of % of signature 32 mutations against estimated duration of azathioprine treatment. B. Table of samples from patients with history of azathioprine use detailing estimate of azathioprine treatment duration (months) and percentage of signature 32 mutations detected in the tumours. C. Spearman's rank-order correlation revealing a statistically significant positive correlation  $r_s(26)=0.679$ ,  $p < 0.0001$ .

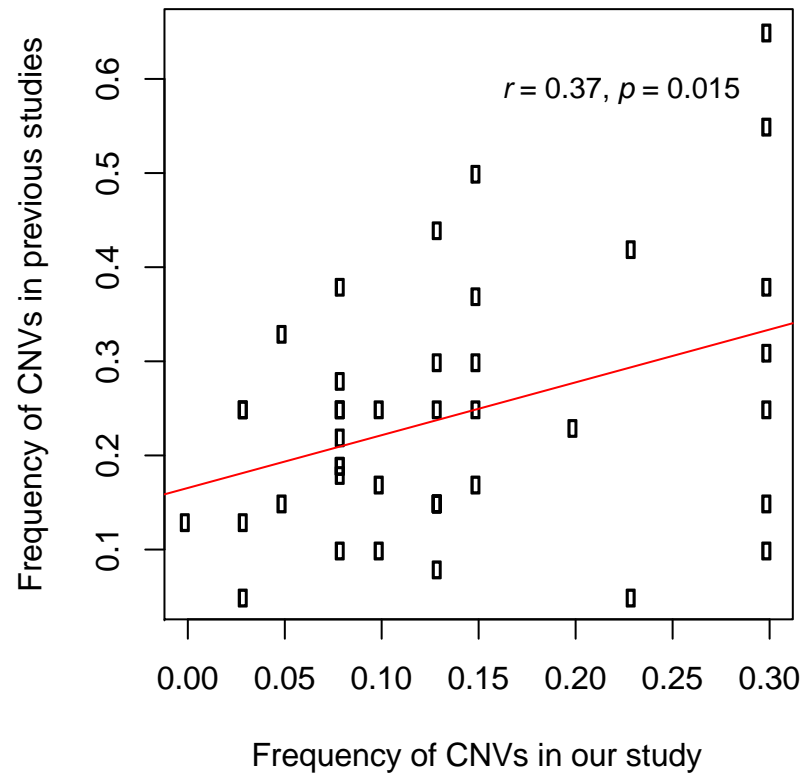

**Supplementary Figure 4. Significant positive correlation between this study and previous studies for top frequent CNVs.** Previous CNV studies included Salgado et al. Genes, Chromosomes and Cancer 2010, Sekulic et al. Cancer Prev Res 2010, Hameetman et al BMC Cancer 2013 and Purdie et al JID 2009

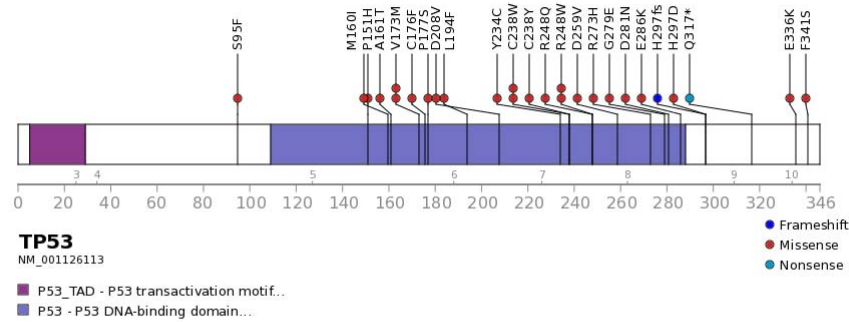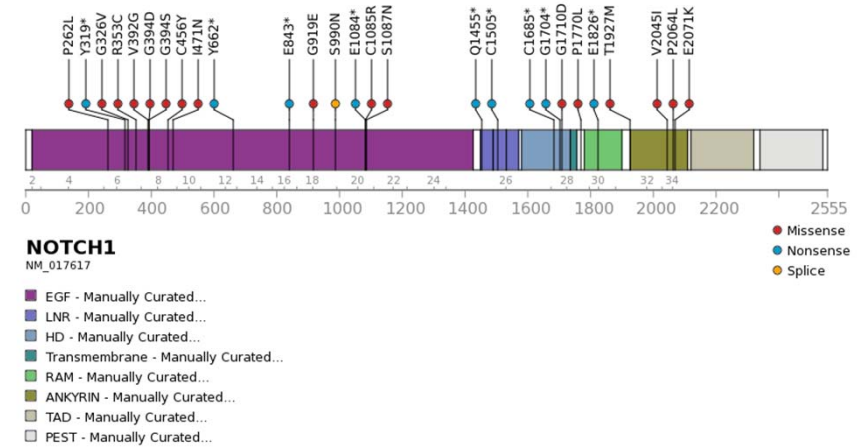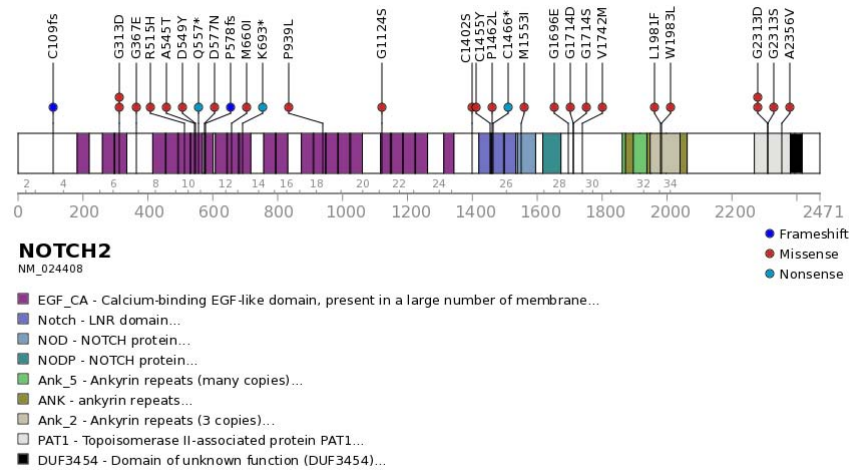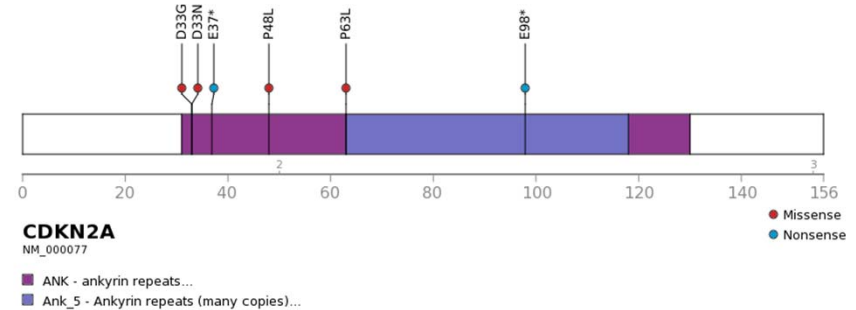

Supplementary Figure 5. Mutational spectrum in 4 SMGs, TP53, NOTCH1, NOTCH2 and CDKN2A

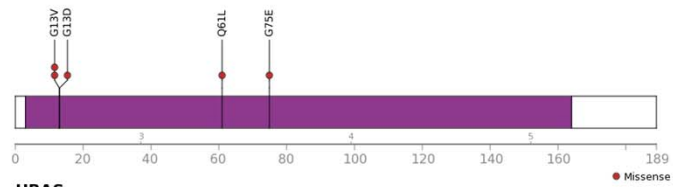

**HRAS**  
 NM\_001130442  
 H\_N\_K\_Ras\_like - Ras GTPase family containing H-Ras,N-Ras and K-Ras4A/4B...

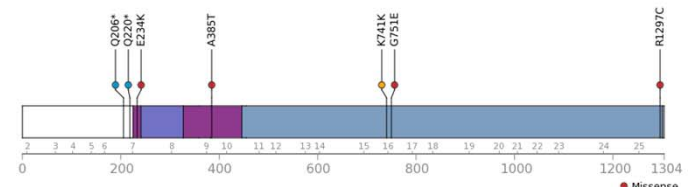

**SF3B1**  
 NM\_012433  
 Nucleoporin\_FG - Nucleoporin FG repeat region...  
 CTD - Spt5 C-terminal nonapeptide repeat binding Spt4...  
 HSH155 - U2 snRNP spliceosome subunit [RNA processing and modification]...

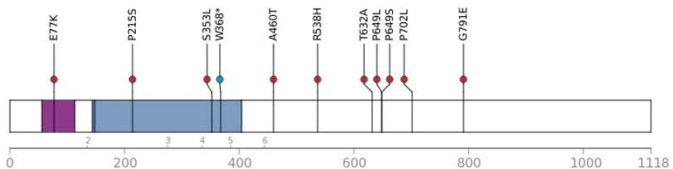

**MAP3K9**  
 NM\_033141  
 SH3 - Src homology 3 domains...  
 TyrKc - Tyrosine kinase, catalytic domain...  
 PTKc - Catalytic domain of Protein Tyrosine Kinases...

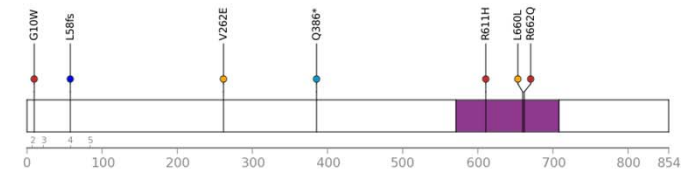

**VPS41**  
 NM\_014396  
 CLH - Clathrin heavy chain repeat homology...

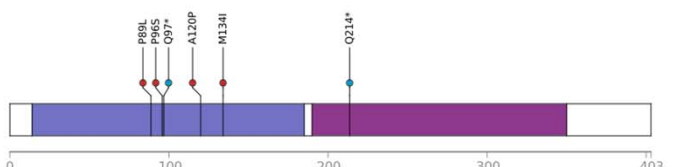

**PTEN**  
 NM\_000314  
 PTPc - Manually Curated...  
 PTEN\_C2 - Manually Curated...

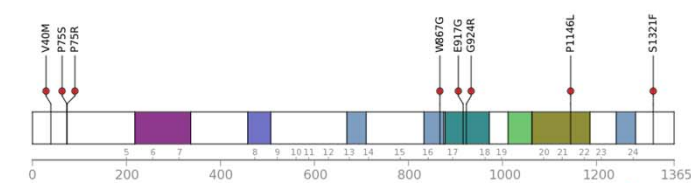

**WHSC1**  
 NM\_133330  
 MSH6\_like - The PWWP domain is present in MSH6, a mismatch repair protein homologo...  
 HMG-box - High Mobility Group (HMG)-box is found in a variety of eukaryotic chro...  
 RING - RING-finger (Really Interesting New Gene) domain, a specialized type o...  
 WHSC1\_related - The PWWP domain was first identified in the WHSC1 (Wolf-Hirschhorn syn...  
 AWS - associated with SET domains...  
 SET - SET domain...

Supplementary Figure 6. Mutational spectrum in HRAS, MAP3K9, PTEN, SF3B1, VPS41 and WHSC1

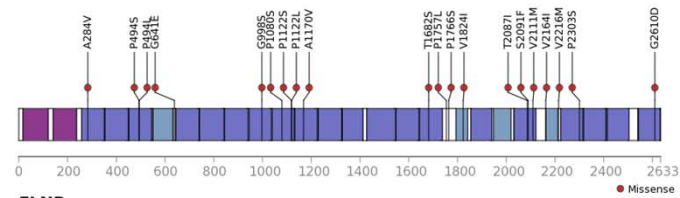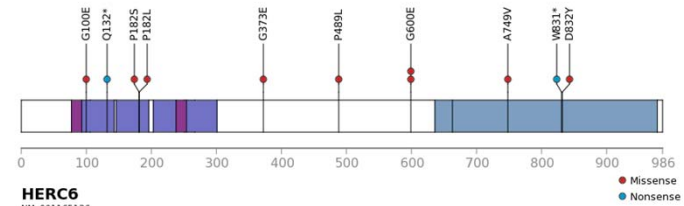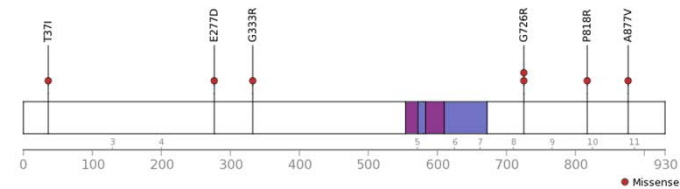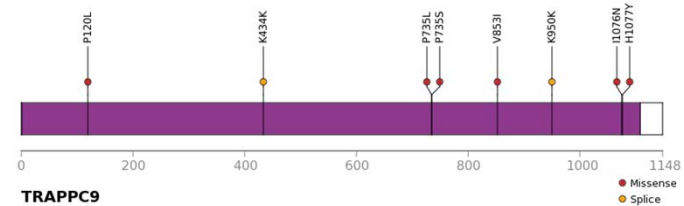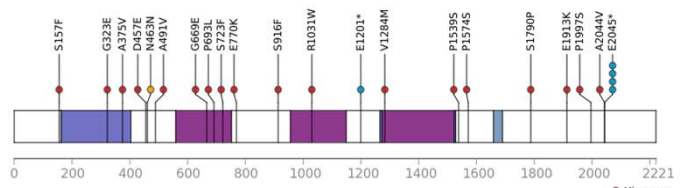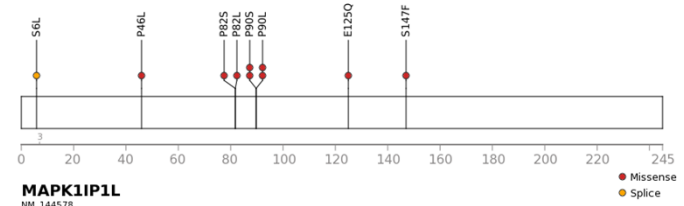

Supplementary Figure 7. Mutational spectrum in FLNB, GLIS3, CACNA1C, HERC6, TRAPPC9 and MAPK1P1L



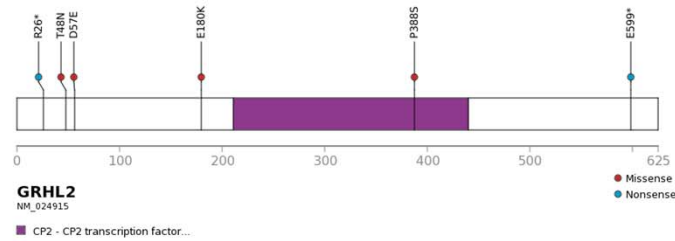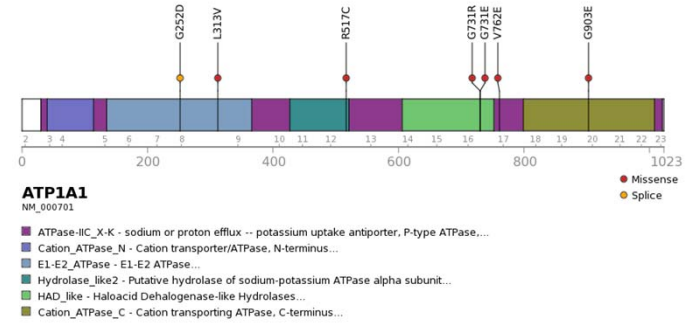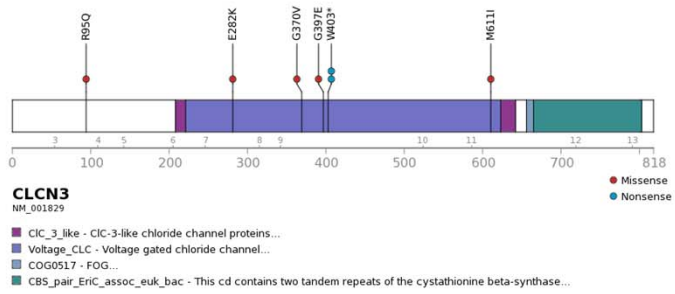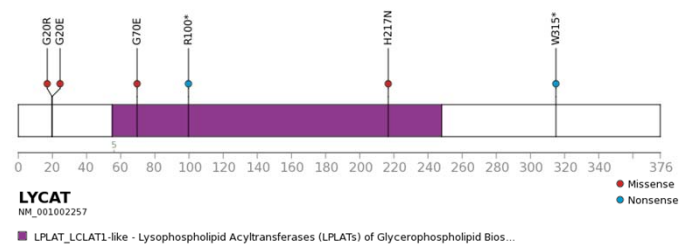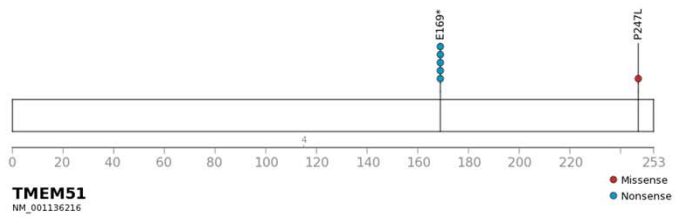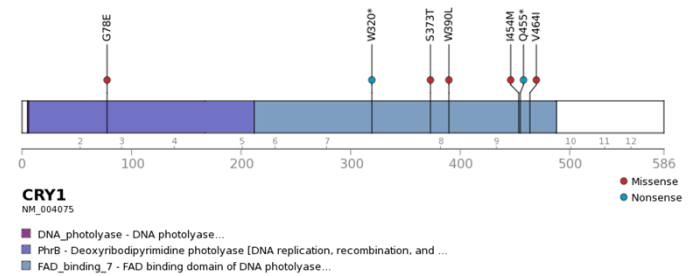

Supplementary Figure 8. Mutational spectrum in GRHL2, CLCN3, TMEM51, ATP1A1, LCLAT1 and CRY1

Supplementary Figure 9. Correlation of tumour purity estimated by EXPANDS and SciClone

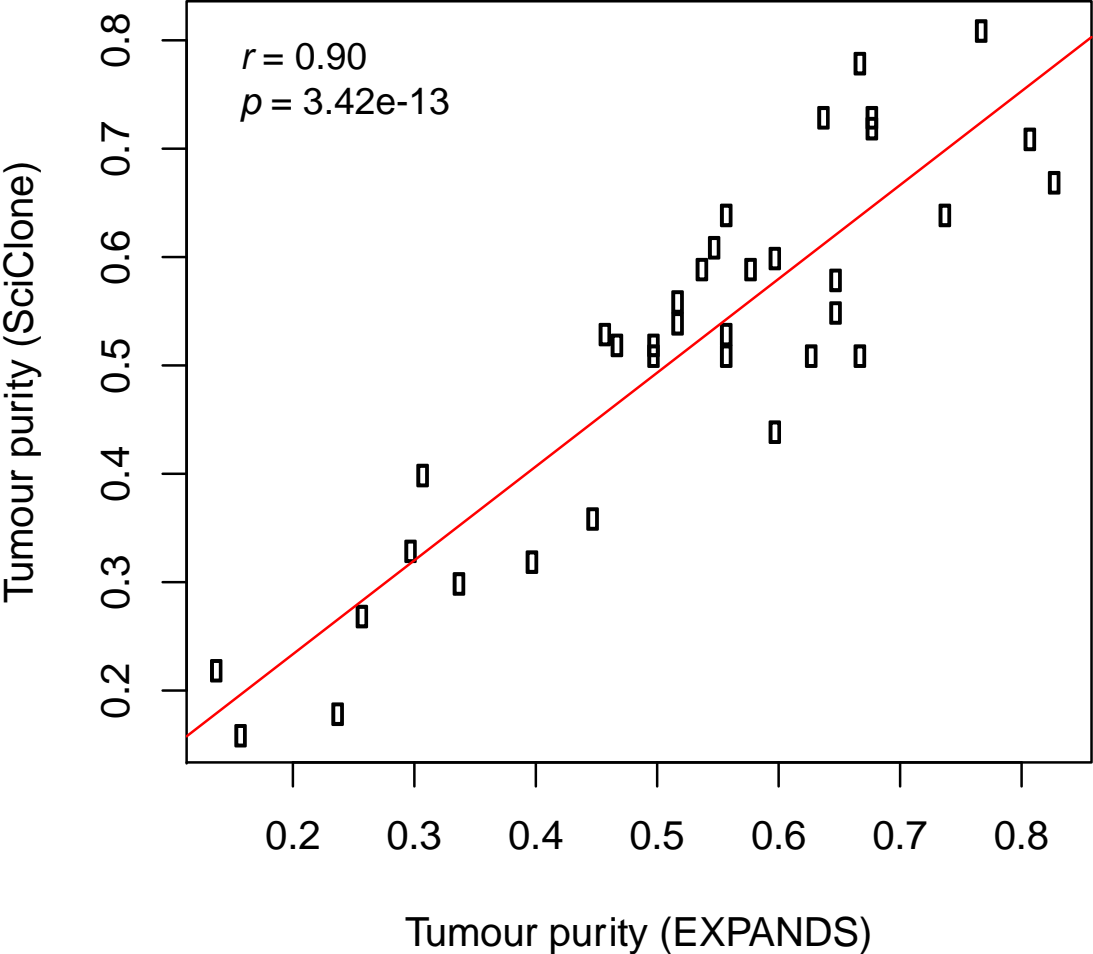

Supplementary Figure 10. Comparison between EXPANDS and SciClone across 35/40 cSCC whole exomes

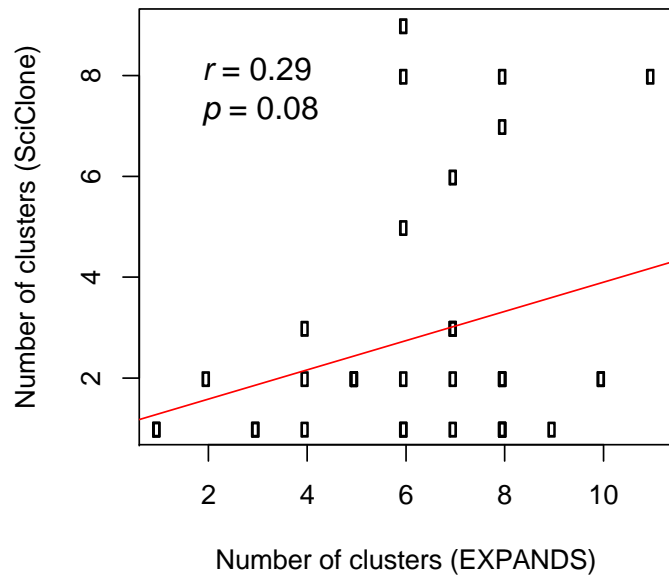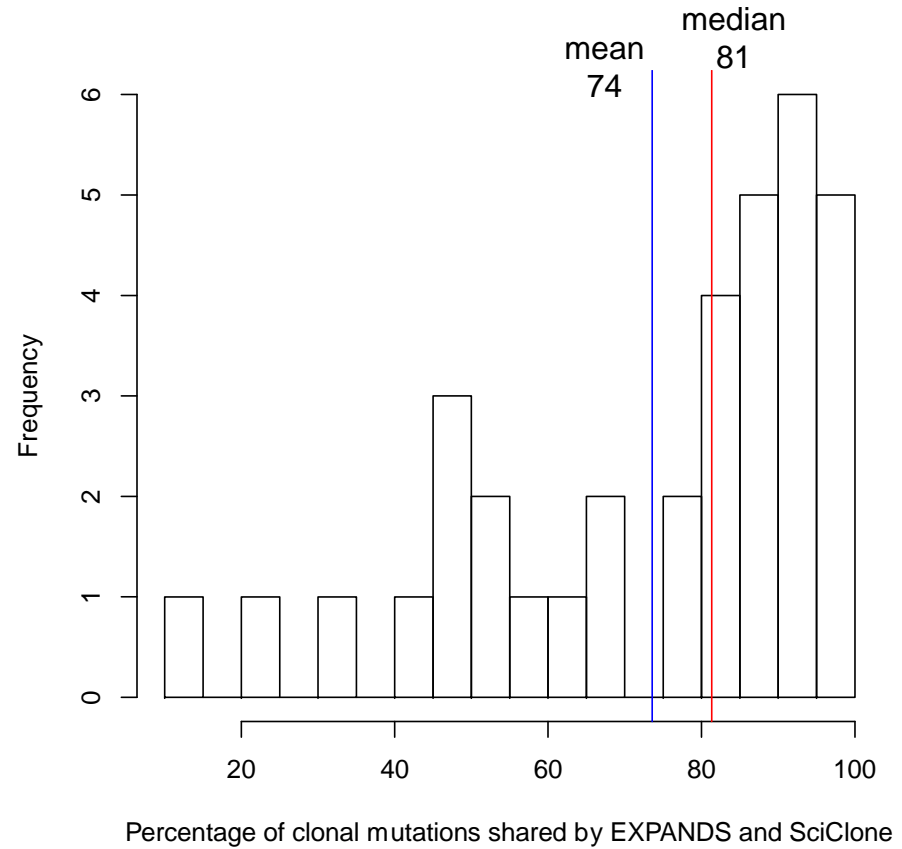

Overall, 74% all 'clonal' mutations called by EXPANDS were also called 'clonal' by SciClone

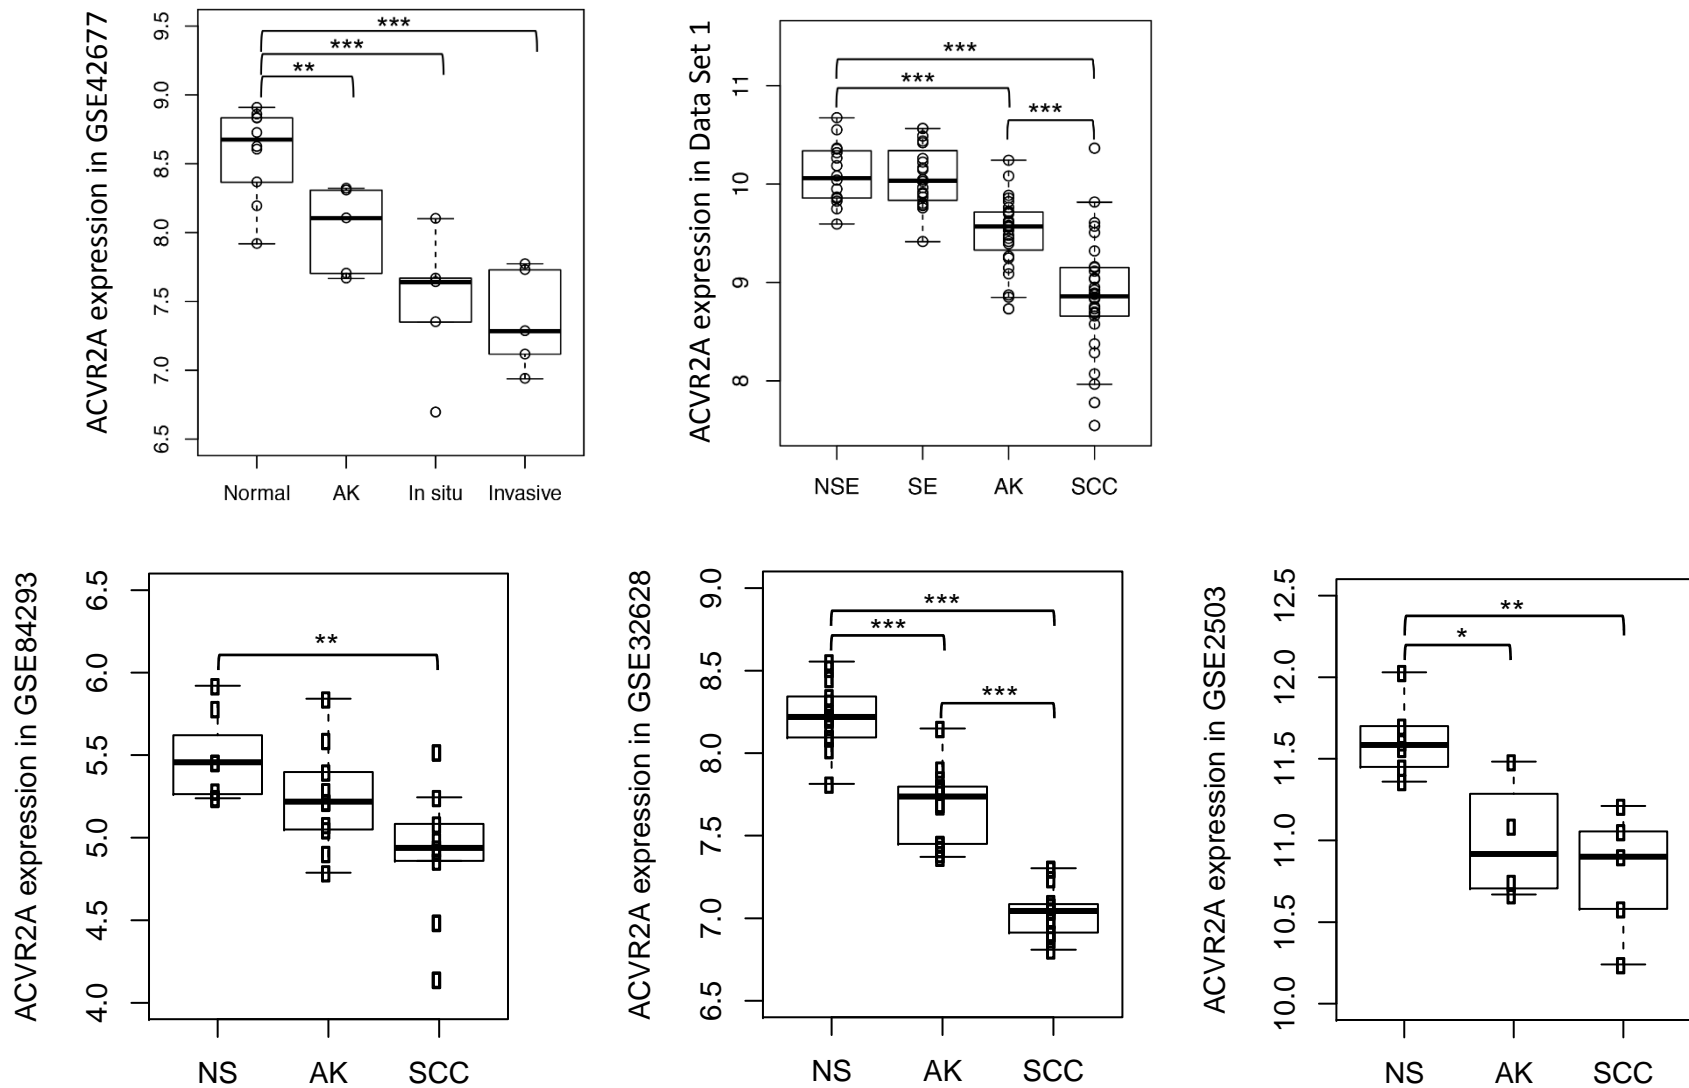

**Supplementary Figure 11.** ACVR2A expression across NS, AK and SCC groups in 5 gene expression profile (GEP) data sets, GSE42677, GSE45216 plus additional samples (Data set 1), GSE84293, GSE32628 and GSE2503 reveals a significant decrease with disease progression.

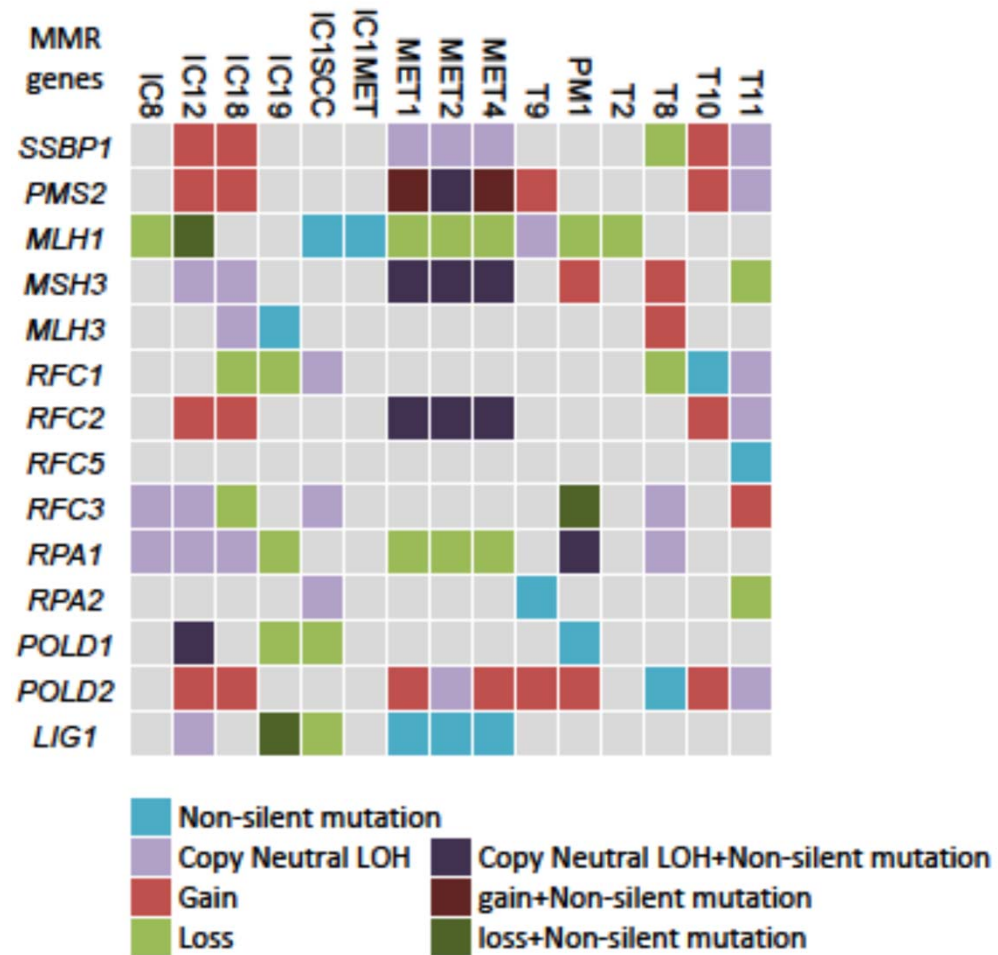

Supplementary Figure 12. OncoPrint of mismatch repair genes in cSCC cell lines

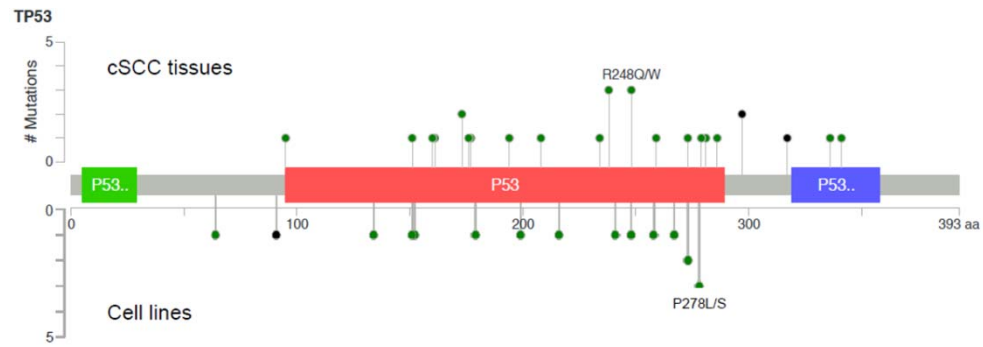

**Supplementary Figure 13.**  
**The mutational profiles**  
**of TP53, NOTCH1 and NOTCH2**  
**are similar in primary cSCC tumours**  
**and cSCC cell lines.**

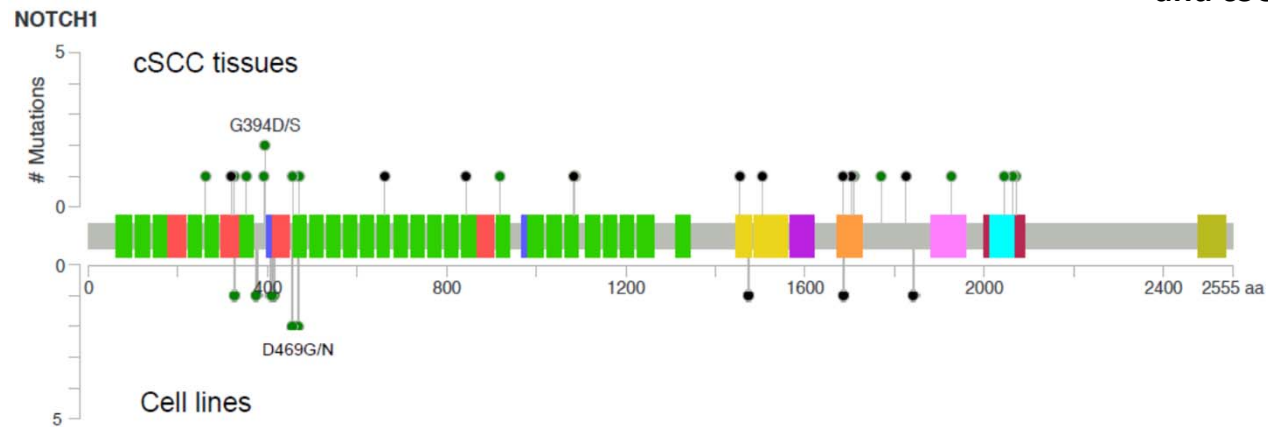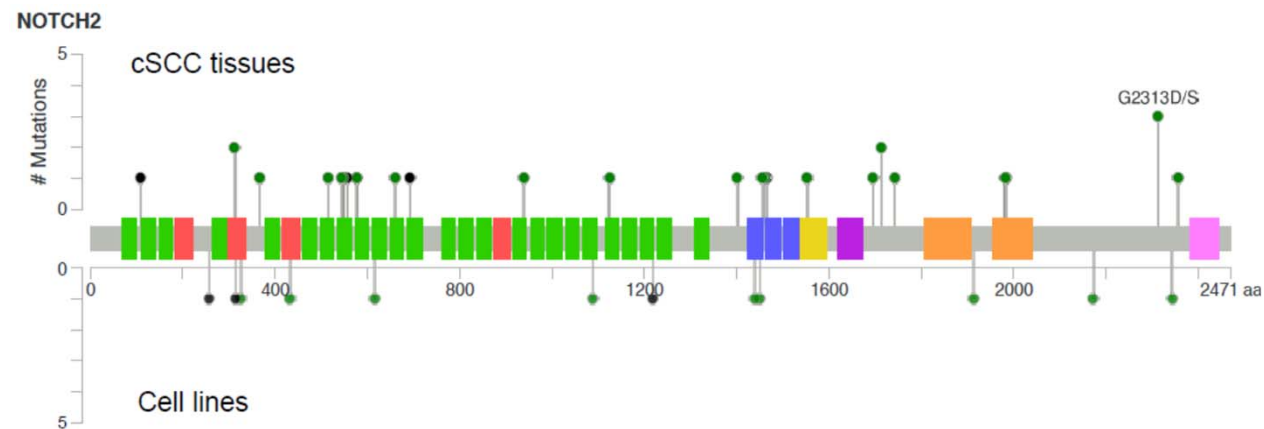

A

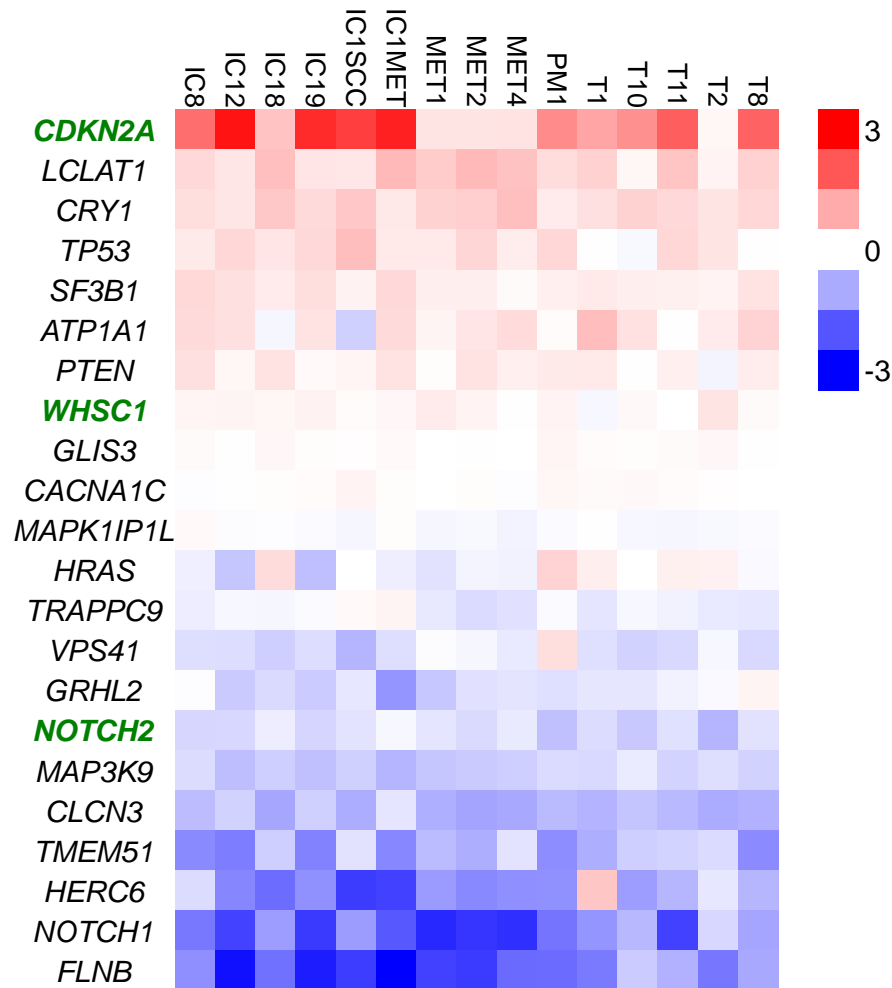

B

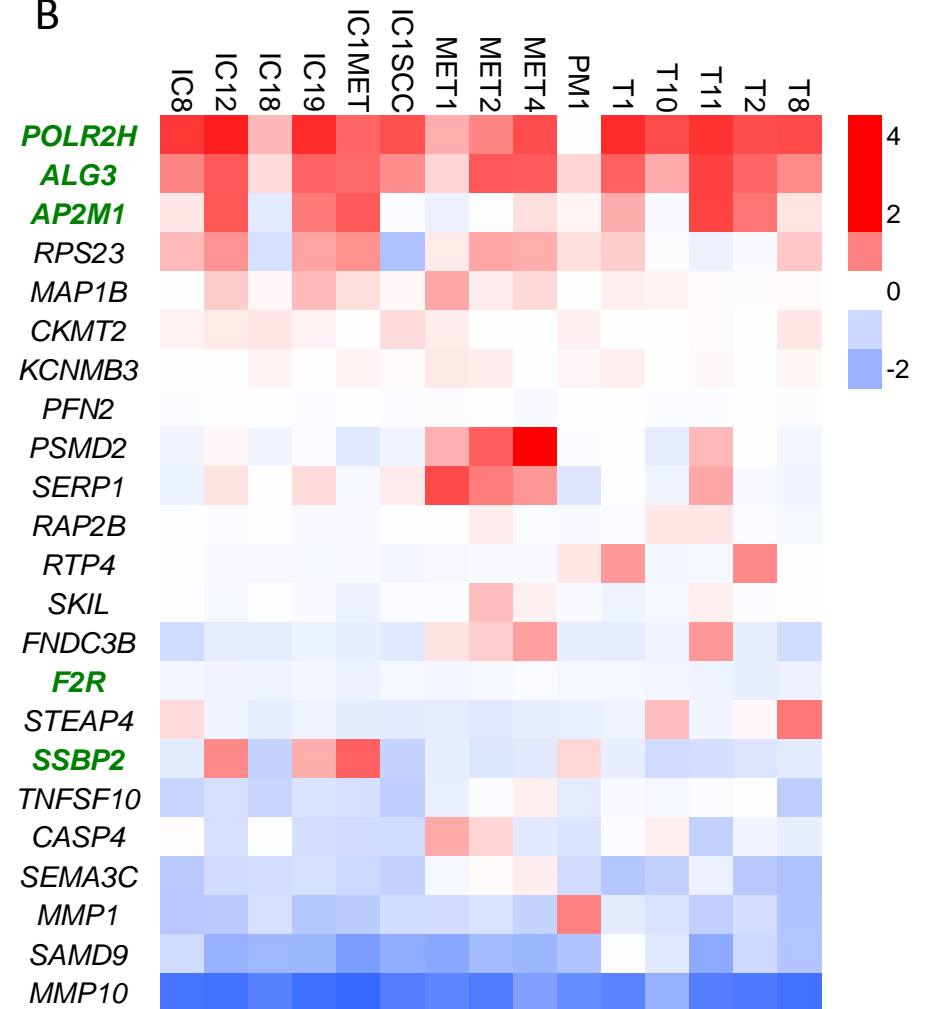

Supplementary Figure 14. Heat map analysis of gene expression changes in cSCC cell lines relative to NHKs.

A) Analysis of the 22 SMGs identified in Figure 3. B) Analysis of the 23 genes of concordant chromosomal alteration identified in Figure 6. One gene NREP had no probe detected. Coincident changes in cell lines and primary tumours are highlighted in green.
