# Supplementary material for: The genomic landscape of cutaneous SCC reveals drivers and a novel azathioprine associated mutational signature
Source: PubMed Central journal article supplement (PMC6131170; doi:10.1038/s41467-018-06027-1), 2018-09-10
Supplement: 41467_2018_6027_MOESM2_ESM.pdf [file 41467_2018_6027_MOESM2_ESM.pdf]

## Description of Additional Supplementary Files

**File Name:** Supplementary Data 1

**Description:** 40 cSCCs - Patient/Tumour Details

**File Name:** Supplementary Data 2

**Description:** Whole exome sequencing (WES) reads yield and coverage across the 40 normal - SCC pairs

**File Name:** Supplementary Data 3

**Description:** All identified somatic mutations across 40 cSCC WES samples, with full annotation, aligned reads, VAF and clonality CCFs, subpopulation frequency estimated by EXPANDS

**File Name:** Supplementary Data 4

**Description:** Mutation signatures across all SCC exomes.

**File Name:** Supplementary Data 5

**Description:** CNAs and cn-LOH events across the 40 SCC exomes

**File Name:** Supplementary Data 6

**Description:** Significantly amplified and deleted regions across the 40 cSCC tumours based on GISTIC2.0

**File Name:** Supplementary Data 7

**Description:** Frequent copy number variations in cSCC

**File Name:** Supplementary Data 8

**Description:** Significantly mutated genes of 40 cSCC exomes based on MutSig analysis ( $p < 0.05$ )

**File Name:** Supplementary Data 9

**Description:** Significantly mutated genes across 40 cSCC exomes based on OncodriveFM ( $q < 0.05$ )

**File Name:** Supplementary Data 10

**Description:** Significantly mutated genes across 40 cSCC exomes based on OncodriveClust ( $q < 0.05$ )

**File Name:** Supplementary Data 11

**Description:** Somatic mutations across 40 cSCC WES samples for NOTCH1/2

**File Name:** Supplementary Data 12

**Description:** Somatic mutations across 40 cSCC WES samples for TP53 and CDKN2A

**File Name:** Supplementary Data 13

**Description:** Cross Study Comparison of Significantly Mutated Genes

**File Name:** Supplementary Data 14

**Description:** Somatic mutations across 40 cSCC WES samples for HRAS, MAP3K9, PTEN, SF3B1, VPS41 and WHSC1

**File Name:** Supplementary Data 15

**Description:** Somatic mutations across 40 cSCC WES samples for FLNB, GLIS3, CACNA1C, HERC6, TRAPPC9 and MAPK11P1L

**File Name:** Supplementary Data 16

**Description:** Somatic mutations across 40 cSCC WES samples for GRHL2, CLCN3, TMEM51, ATP1A1, LCLAT1 and CRY1

**File Name:** Supplementary Data 17

**Description:** Comparison of 22 SMGs alteration frequencies in immunosuppressed (IS) an immunocompetent (IC) patient samples

**File Name:** Supplementary Data 18

**Description:** Mutational signature analysis of mutations in 22 SMGs

**File Name:** Supplementary Data 19

**Description:** Tumour purity estimates by EXPANDS and SciClone

**File Name:** Supplementary Data 20

**Description:** Estimated number of clones in 35 Exome samples

**File Name:** Supplementary Data 21

**Description:** Rank order clonality of 22 SMGs

**File Name:** Supplementary Data 22

**Description:** Gene expression Data set 1

**File Name:** Supplementary Data 23

**Description:** Cross Study Comparison of Significantly Mutated Genes by Differentiation Status

**File Name:** Supplementary Data 24

**Description:** Kegg pathway analysis

**File Name:** Supplementary Data 25

**Description:** OncodriveFM pathway mutation significance for all profiled KEGG pathways

**File Name:** Supplementary Data 26

**Description:** cSCC Cell Line Patient Details

**File Name:** Supplementary Data 27

**Description:** All identified annotated somatic mutations in 15 cell lines

**File Name:** Supplementary Data 28

**Description:** Mutation signatures across all cSCC cell lines.

**File Name:** Supplementary Data 29

**Description:** Somatic nonsynonymous mutations in the 22 SMGs across cell lines

**File Name:** Supplementary Data 30

**Description:** Differential expression analysis of SCC cell lines against normal human keratinocytes
